# Supplementary material
Source: PubMed Central journal article supplement (PMC4422072)
Supplement: NIHMS671252-supplement-1.pdf [file NIHMS671252-supplement-1.pdf]

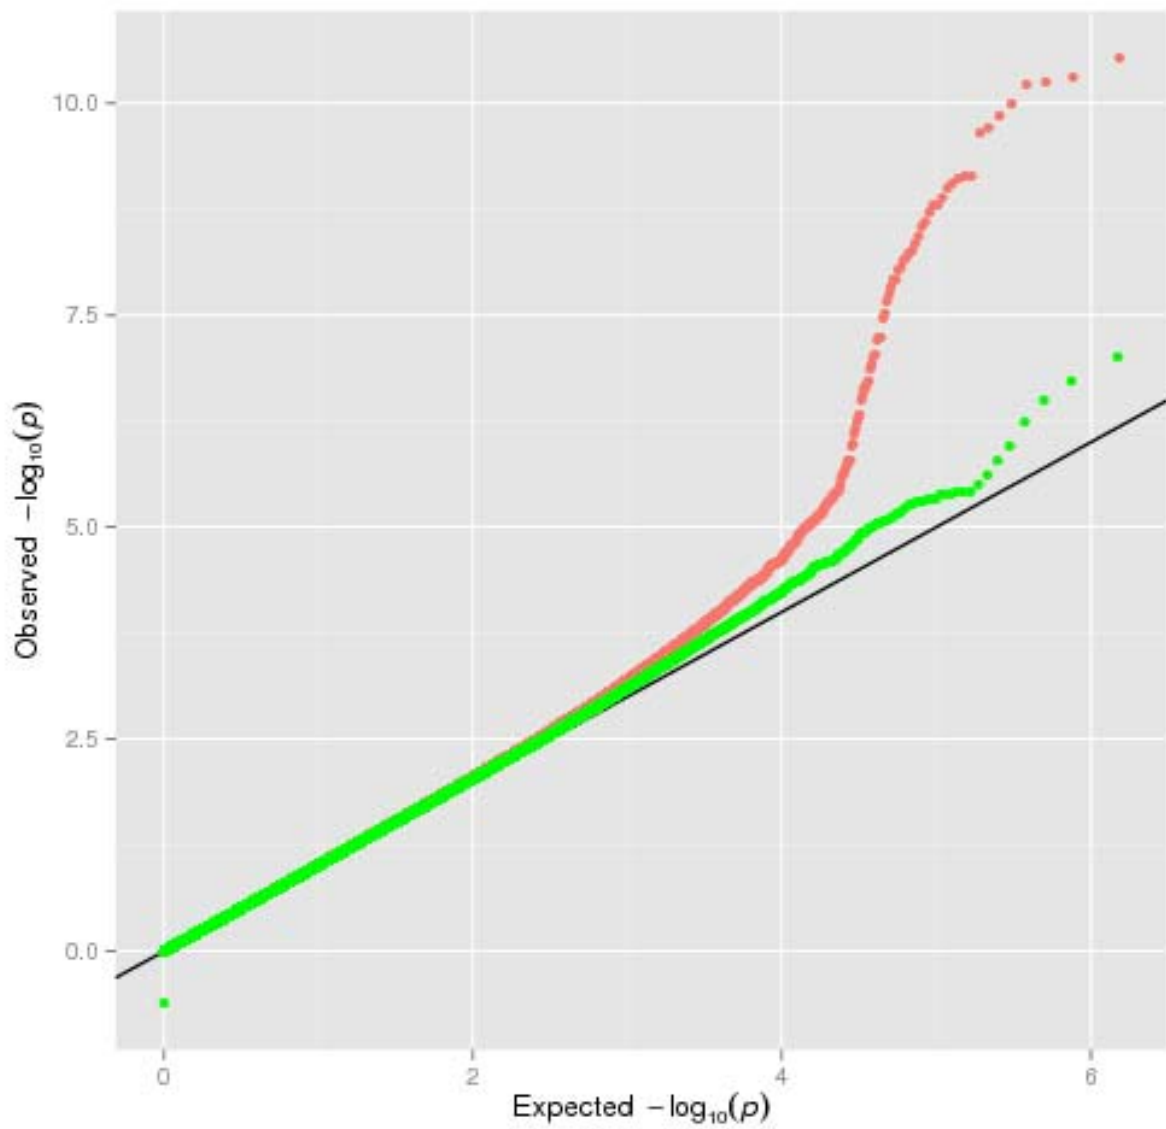

**Supplementary Figure 1.** Quantile-quantile (Q-Q) plot of the  $-\log_{10}$  p-value association results from logistic regression models for prostate cancer risk in stage 1 (red) and after removing any SNPs within 500 kb of a previously established locus (green).

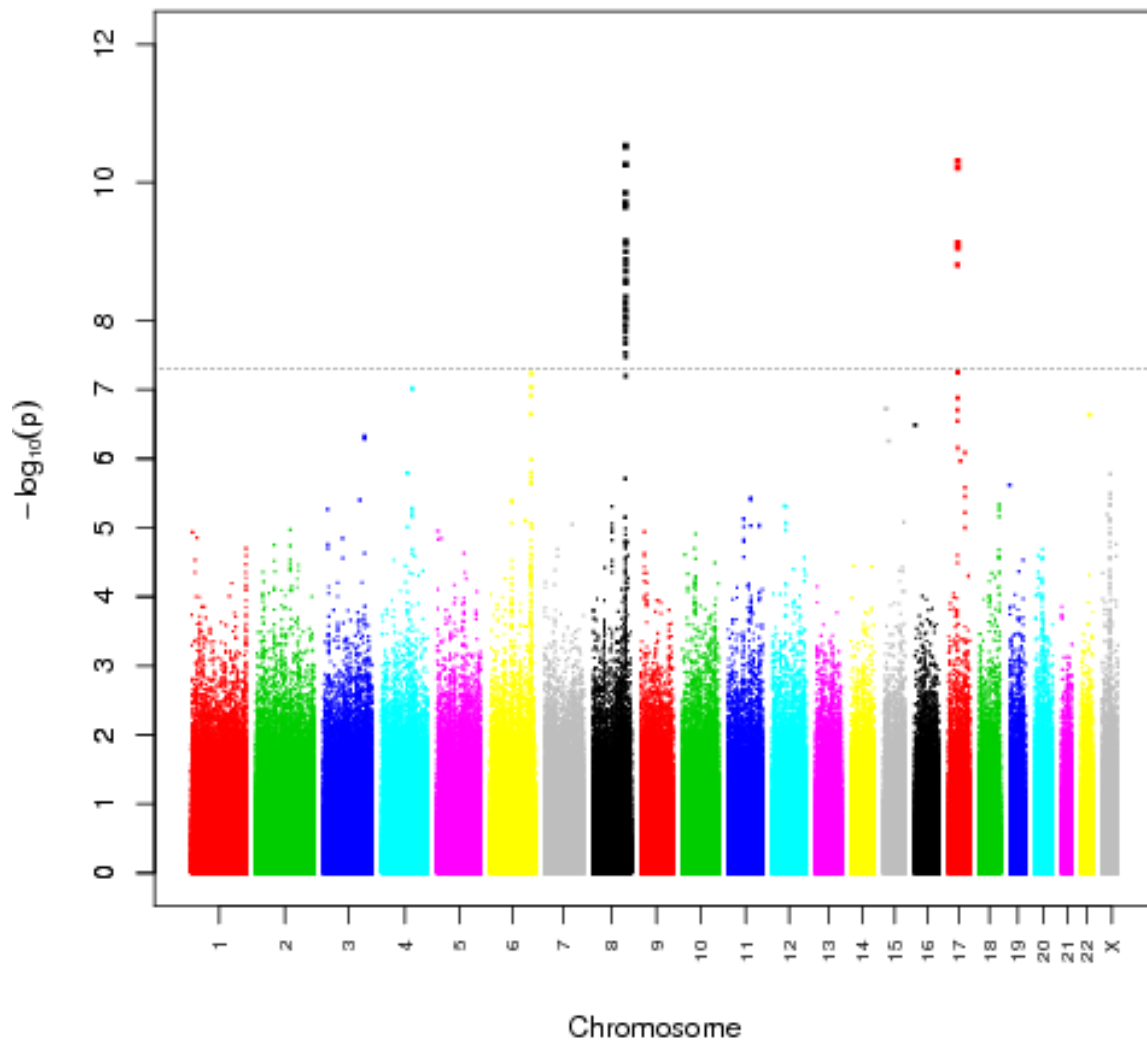

**Supplementary Figure 2.** Manhattan plot showing the statistical significance of the association for all genotyped SNPs in the stage 1 analysis. SNPs are plotted on the x-axis according to their position on each chromosome against the significance of the association on the y-axis (shown as  $-\log_{10}$  P-value). P-values are based on logistic regression models for prostate cancer risk. Red line denotes  $P=5 \times 10^{-8}$  statistical significance.

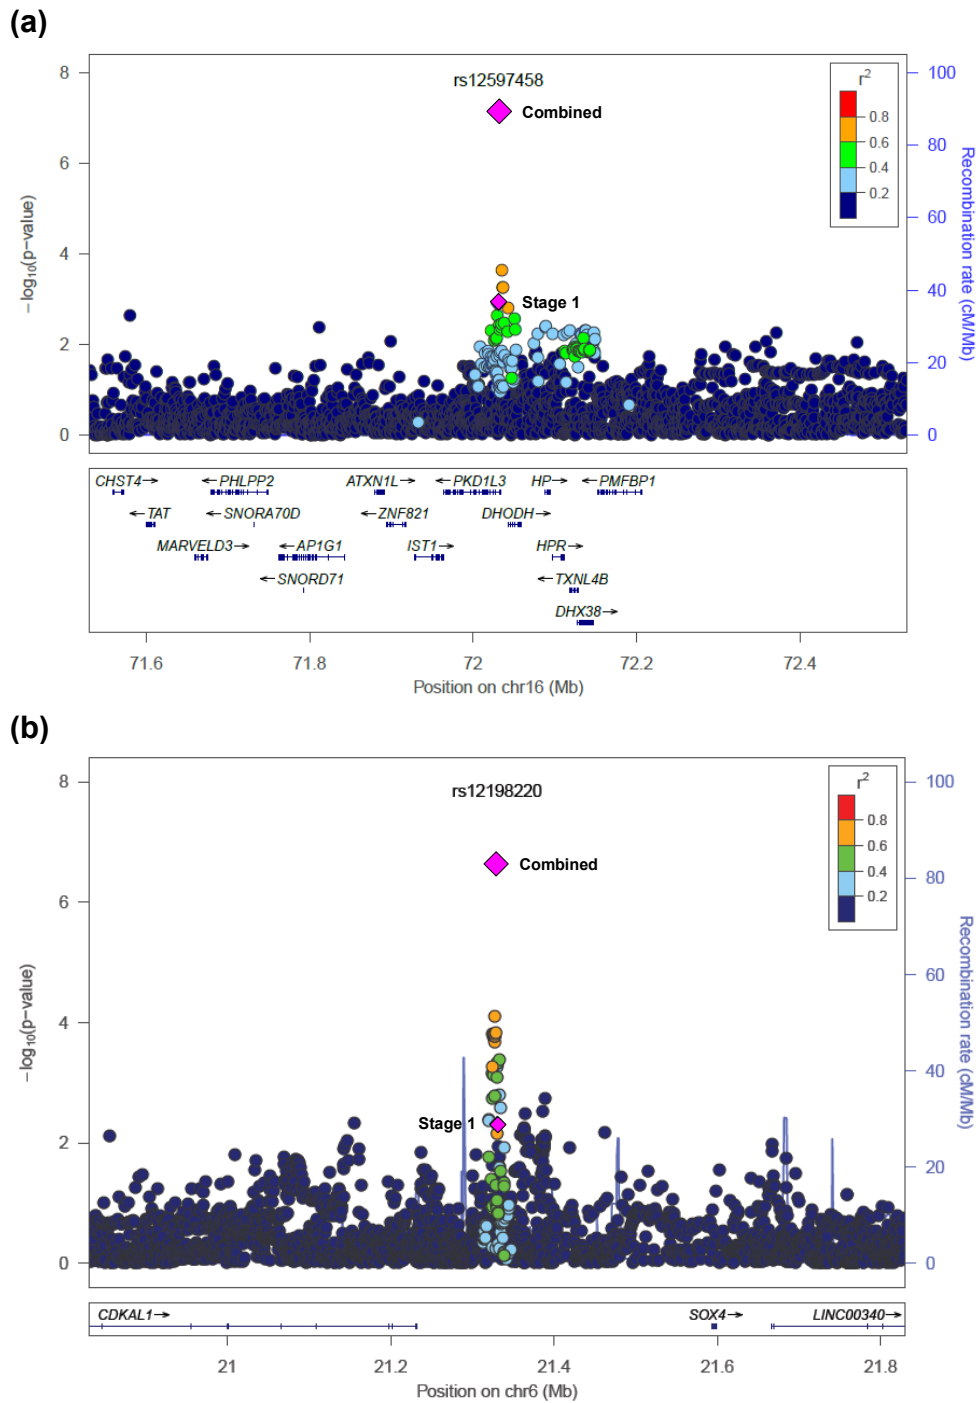

**Supplementary Figure 3.** Regional association plots of the two suggestive loci associated with prostate cancer risk: (a) chromosome 16q22.2 (rs12597458) and (b) chromosome 6p22.3 (rs12198220). Shown are the  $-\log_{10}$  association p-values for stage 1 (dots and lower pink diamond) and  $-\log_{10}$  p-value for the combined stage 1-3 analysis (upper diamond) based on logistic regression models.

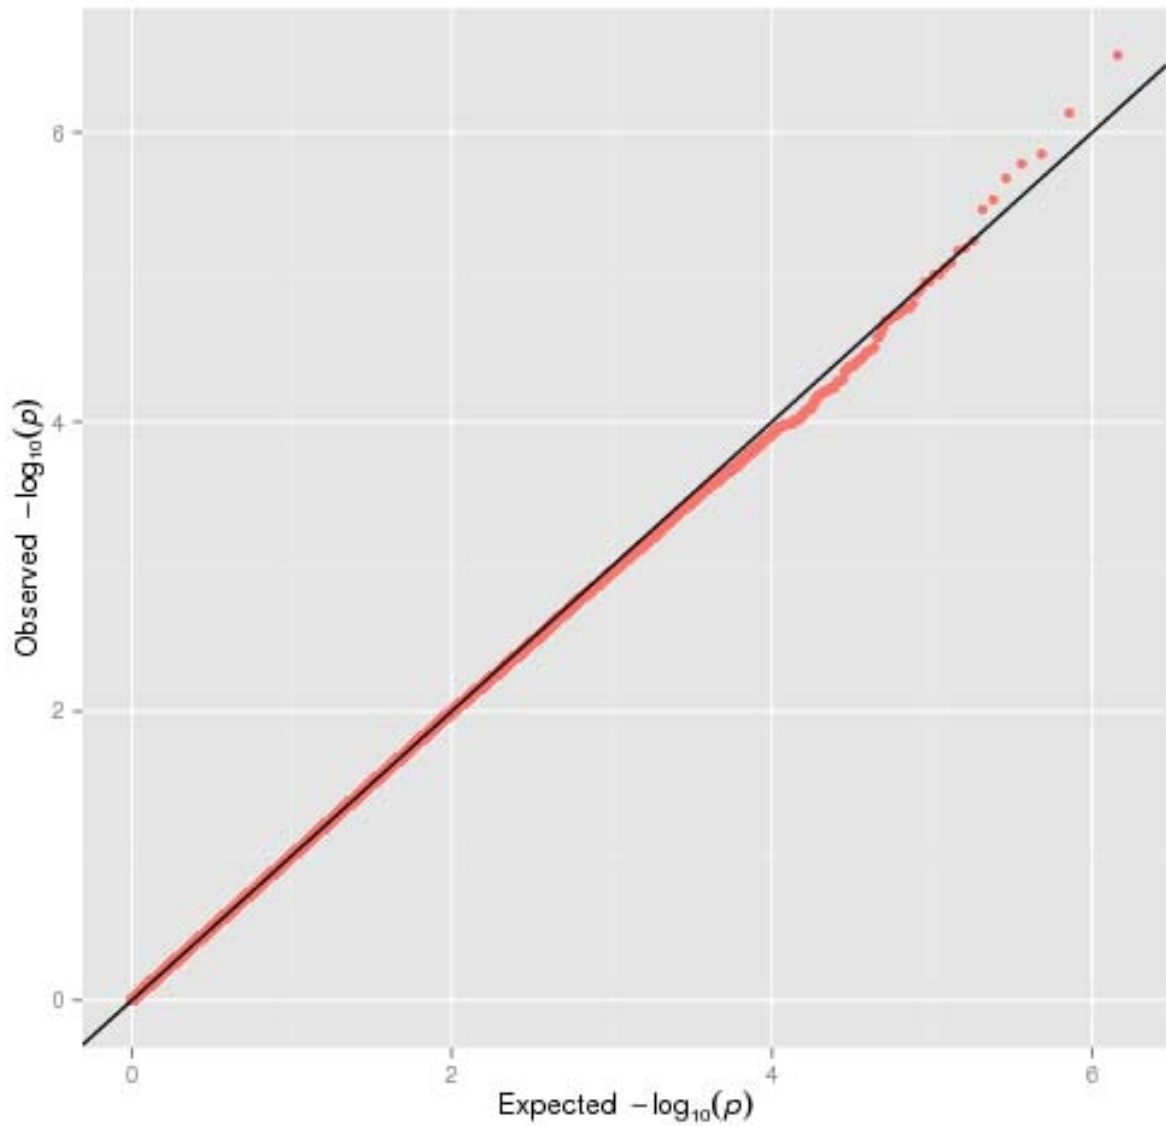

**Supplementary Figure 4.** Quantile-quantile (Q-Q) plot of the association results ( $-\log_{10}$  p-values) for Gleason score as a quantitative trait among prostate cancer cases in stage 1 (red). P-values were calculated from linear regression models.

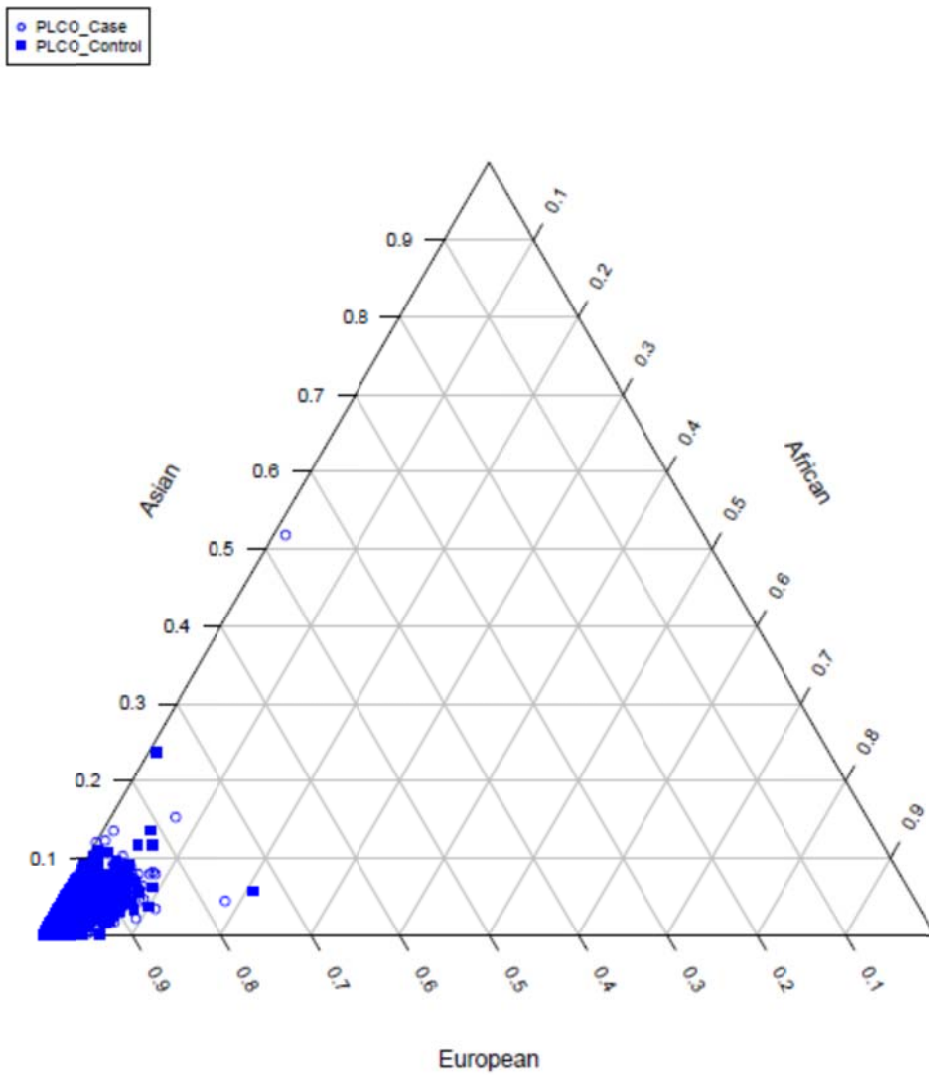

**Supplementary Figure 5.** Plot of estimated admixture for individuals in stage 1. Individuals with <80% European ancestry were excluded.

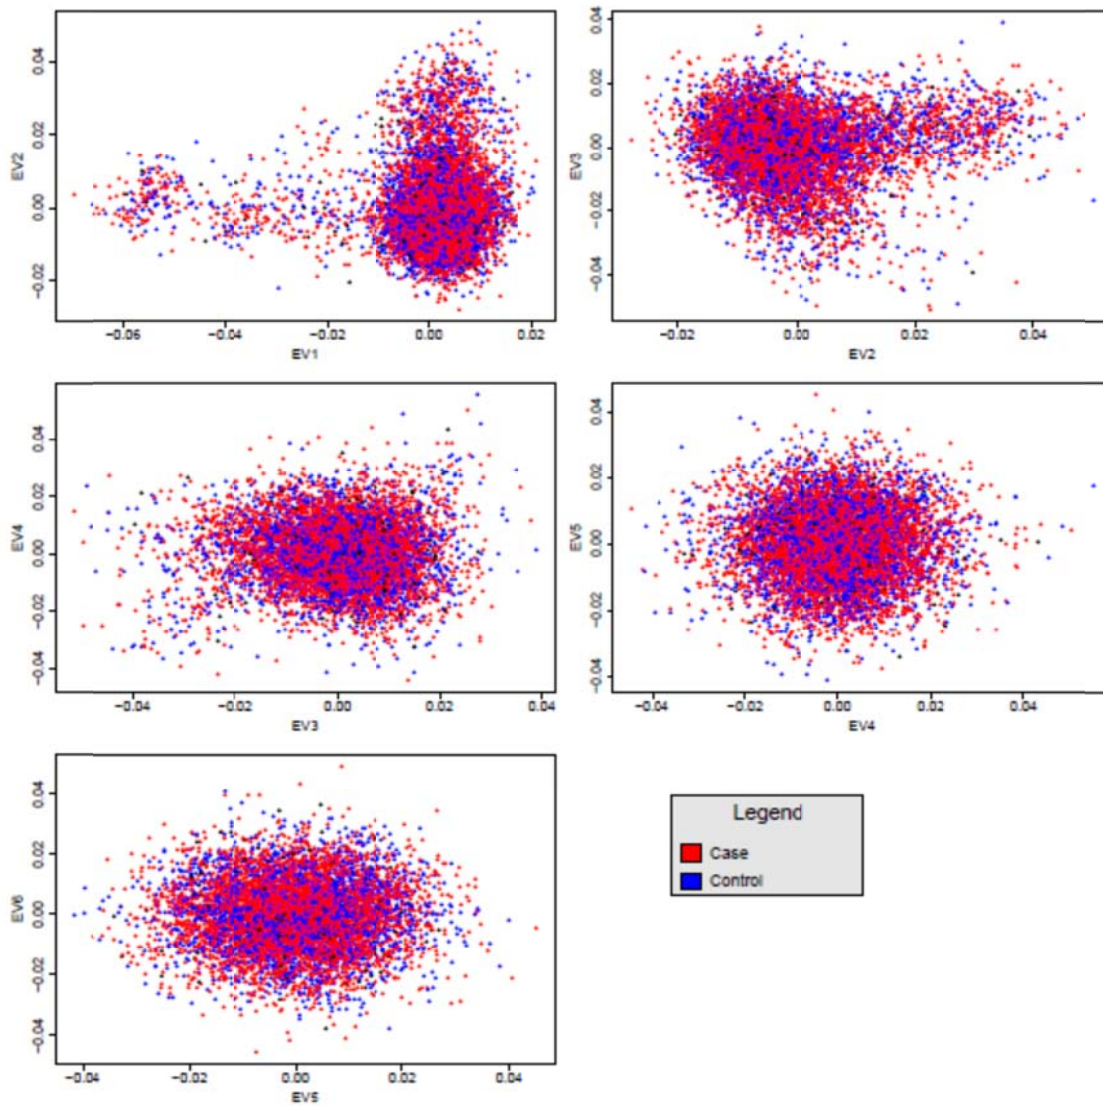

**Supplementary Figure 6.** Plot of top eigenvectors from stage 1 data based on principal components analysis.

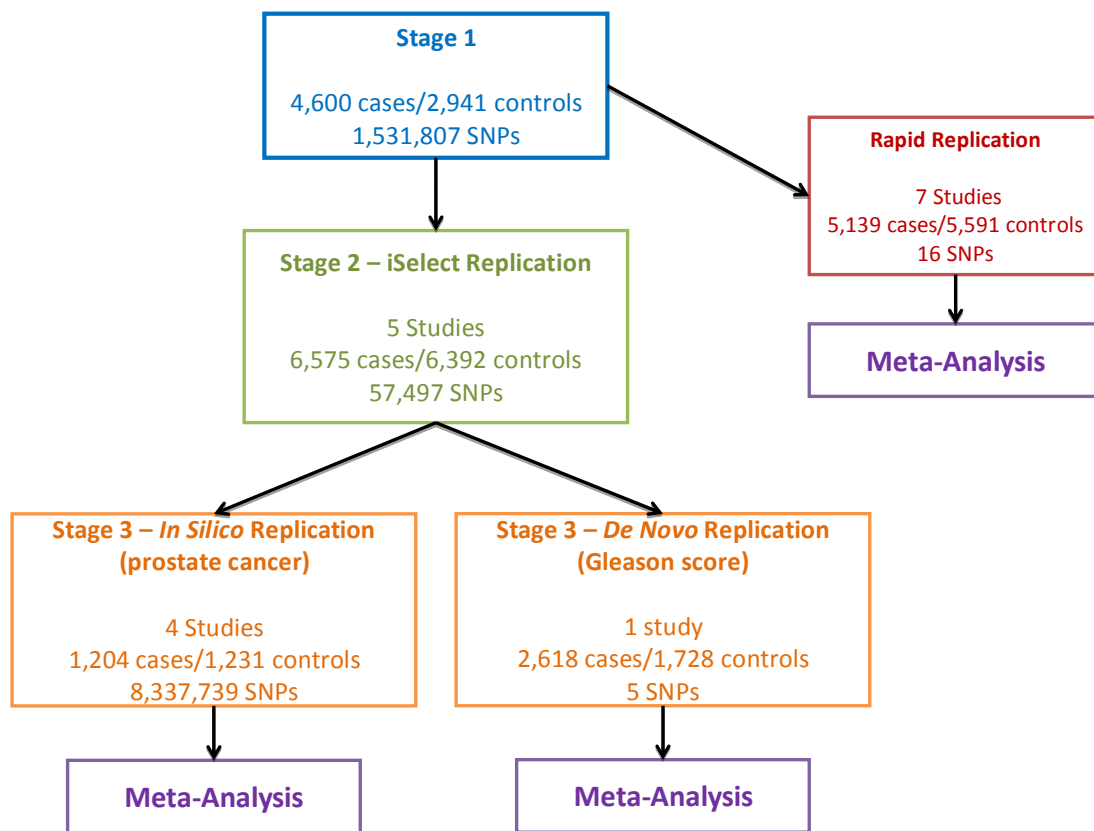

**Supplementary Figure 7.** Flowchart describing the multistage study design

**Supplementary Table 1.** Baseline characteristics of the subjects included in stage 1 and stage 2

|                            | Stage 1                                   | Stage 2 Studies                      |                                         |                                          |                                      |                                      |
|----------------------------|-------------------------------------------|--------------------------------------|-----------------------------------------|------------------------------------------|--------------------------------------|--------------------------------------|
|                            | Pegasus<br>(4600 cases,<br>2941 controls) | ATBC<br>(979 cases, 942<br>controls) | CPSII<br>(2714 cases,<br>2440 controls) | CeRePP<br>(1338 cases,<br>1340 controls) | HPFS<br>(885 cases, 893<br>controls) | PLCO<br>(659 cases, 777<br>controls) |
| Mean age ( $\pm$ SD)       |                                           |                                      |                                         |                                          |                                      |                                      |
| Cases                      | 68.8 $\pm$ 5.8                            | 69.8 $\pm$ 5.8                       | 70.2 $\pm$ 5.7                          | 65.5 $\pm$ 8.3                           | 69.8 $\pm$ 7.4                       | 72.4 $\pm$ 5.4                       |
| Controls                   | 67.9 $\pm$ 5.8                            | 69.3 $\pm$ 6.1                       | 70.3 $\pm$ 5.7                          | 65.3 $\pm$ 8.2                           | 67.2 $\pm$ 7.8                       | 70.4 $\pm$ 5.7                       |
| Gleason score              |                                           |                                      |                                         |                                          |                                      |                                      |
| $\leq$ 6                   | 2693 (58.5%)                              | 196 (20.0%)                          | 1389 (51.2%)                            | 420 (31.4%)                              | 418 (47.2%)                          | 274 (41.6%)                          |
| 7                          | 1429 (31.1%)                              | 80 (8.2%)                            | 661 (24.4%)                             | 668 (49.9%)                              | 238 (26.9%)                          | 267 (40.5%)                          |
| $\geq$ 8                   | 423 (9.2%)                                | 52 (5.3%)                            | 271 (10.0%)                             | 246 (18.4%)                              | 64 (7.2%)                            | 111 (16.8%)                          |
| Unknown                    | 55 (1.2%)                                 | 651 (66.5%)                          | 356 (13.1%)                             | 0                                        | 154 (17.4%)                          | 7 (1.1%)                             |
| Disease aggressiveness     |                                           |                                      |                                         |                                          |                                      |                                      |
| Stage I/II and Gleason <8  | 3729 (81.1%)                              | 163 (16.6%)                          | 1858 (68.5%)                            | 844 (63.1%)                              | 590 (66.7%)                          | 503 (76.3%)                          |
| Stage III/IV or Gleason 8+ | 815 (17.7%)                               | 112 (11.4%)                          | 458 (16.9%)                             | 490 (36.6%)                              | 119 (13.4%)                          | 149 (22.6%)                          |
| Unknown                    | 56 (1.2%)                                 | 704 (71.9%)                          | 398 (14.7%)                             | 4 (0.3%)                                 | 176 (19.9%)                          | 7 (1.1%)                             |



**Supplementary Table 2. Stage 1 association results for risk of prostate cancer with previously reported loci**

| SNP                            | Chr     | Position  | Effect allele | Other allele | Info  | EAF   | No. cases/ No. controls | OR   | Lower CI | Upper CI | P        | Reference     | PUBMED ID |
|--------------------------------|---------|-----------|---------------|--------------|-------|-------|-------------------------|------|----------|----------|----------|---------------|-----------|
| <b>Discovered in Europeans</b> |         |           |               |              |       |       |                         |      |          |          |          |               |           |
| rs636291                       | 1p35    | 10556097  | A             | G            | 0.983 | 0.674 | 4,599/2,940             | 1.04 | 0.97     | 1.12     | 0.24     | Al Olama A    | 25217961  |
| rs17599629                     | 1q21    | 150658287 | G             | A            | 1     | 0.212 | 4,600/2,941             | 1.11 | 1.03     | 1.21     | 0.007    | Al Olama A    | 25217961  |
| rs1218582                      | 1q21.3  | 154834183 | A             | G            | 0.994 | 0.554 | 4,600/2,941             | 0.95 | 0.89     | 1.01     | 0.12     | Eeles RA      | 23535732  |
| rs1775148                      | 1q32    | 205757824 | T             | C            | 0.953 | 0.625 | 4,599/2,940             | 0.96 | 0.89     | 1.02     | 0.21     | Al Olama A    | 25217961  |
| rs4245739                      | 1q32.1  | 204518842 | A             | C            | 1     | 0.729 | 4,600/2,941             | 1.07 | 1.00     | 1.16     | 0.06     | Eeles RA      | 23535732  |
| rs10187424                     | 2p11.2  | 85794297  | C             | T            | 1     | 0.418 | 4,600/2,941             | 0.98 | 0.92     | 1.05     | 0.60     | Kote-Jarai Z  | 21743467  |
| rs721048                       | 2p15    | 63131731  | A             | G            | 1     | 0.187 | 4,600/2,941             | 1.04 | 0.95     | 1.13     | 0.38     | Gudmundsson J | 18264098  |
| rs1465618                      | 2p21    | 43553949  | C             | T            | 0.995 | 0.791 | 4,600/2,940             | 0.96 | 0.89     | 1.04     | 0.31     | Eeles RA      | 19767753  |
| rs9287719                      | 2p25    | 10710730  | T             | C            | 0.998 | 0.533 | 4,600/2,941             | 0.94 | 0.88     | 1.00     | 0.06     | Al Olama A    | 25217961  |
| rs11902236                     | 2p25.1  | 10117868  | T             | C            | 1     | 0.279 | 4,600/2,941             | 1.02 | 0.95     | 1.10     | 0.54     | Eeles RA      | 23535732  |
| rs12621278                     | 2q31.1  | 173311553 | G             | A            | 0.998 | 0.060 | 4,600/2,940             | 0.90 | 0.78     | 1.04     | 0.15     | Eeles RA      | 19767753  |
| rs7584330                      | 2q37.3  | 238387228 | G             | A            | 1     | 0.229 | 4,600/2,941             | 1.11 | 1.03     | 1.20     | 0.008    | Kote-Jarai Z  | 21743467  |
| rs2292884                      | 2q37.3  | 238443226 | G             | A            | 1     | 0.242 | 4,600/2,941             | 1.07 | 0.99     | 1.16     | 0.08     | Schumacher FR | 21743057  |
| rs3771570                      | 2q37.3  | 242382864 | T             | C            | 0.985 | 0.153 | 4,600/2,941             | 1.02 | 0.93     | 1.11     | 0.69     | Eeles RA      | 23535732  |
| rs2660753                      | 3p12.1  | 87110674  | C             | T            | 1     | 0.889 | 4,600/2,941             | 0.91 | 0.82     | 1.01     | 0.07     | Eeles RA      | 18264097  |
| rs17181170                     | 3p12.1  | 87173324  | A             | G            | 1     | 0.492 | 4,600/2,941             | 0.95 | 0.89     | 1.01     | 0.12     | Eeles RA      | 19767753  |
| rs7611694                      | 3q13.2  | 113275624 | C             | A            | 1     | 0.415 | 4,600/2,941             | 0.92 | 0.86     | 0.99     | 0.02     | Eeles RA      | 23535732  |
| rs10934853                     | 3q21.3  | 128038373 | A             | C            | 1     | 0.268 | 4,600/2,941             | 1.13 | 1.05     | 1.21     | 0.001    | Gudmundsson J | 19767754  |
| rs6763931                      | 3q23    | 141102833 | A             | G            | 1     | 0.434 | 4,600/2,941             | 1.06 | 0.99     | 1.13     | 0.09     | Kote-Jarai Z  | 21743467  |
| rs10936632                     | 3q26.2  | 170130102 | A             | C            | 0.987 | 0.501 | 4,599/2,940             | 1.15 | 1.08     | 1.23     | 2.05E-05 | Kote-Jarai Z  | 21743467  |
| rs10009409                     | 4q13    | 73855253  | T             | C            | 1     | 0.300 | 4,600/2,941             | 1.11 | 1.03     | 1.19     | 0.004    | Al Olama A    | 25217961  |
| rs1894292                      | 4q13.3  | 74349158  | A             | G            | 1     | 0.482 | 4,600/2,941             | 0.95 | 0.89     | 1.01     | 0.12     | Eeles RA      | 23535732  |
| rs17021918                     | 4q22.3  | 95562877  | T             | C            | 0.999 | 0.353 | 4,599/2,940             | 0.95 | 0.89     | 1.02     | 0.17     | Eeles RA      | 19767753  |
| rs12500426                     | 4q22.3  | 95514609  | C             | A            | 0.984 | 0.545 | 4,600/2,940             | 0.94 | 0.88     | 1.00     | 0.06     | Eeles RA      | 19767753  |
| rs7679673                      | 4q24    | 106061534 | A             | C            | 1     | 0.416 | 4,600/2,941             | 0.86 | 0.81     | 0.92     | 1.06E-05 | Eeles RA      | 19767753  |
| rs2121875                      | 5p12    | 44365545  | A             | C            | 1     | 0.675 | 4,600/2,941             | 0.94 | 0.88     | 1.01     | 0.10     | Kote-Jarai Z  | 21743467  |
| rs2242652                      | 5p15.33 | 1280028   | A             | G            | 0.949 | 0.198 | 4,600/2,941             | 0.88 | 0.81     | 0.96     | 0.004    | Kote-Jarai Z  | 21743467  |
| rs6869841                      | 5q35.2  | 172939426 | T             | C            | 1     | 0.215 | 4,600/2,941             | 0.99 | 0.91     | 1.07     | 0.72     | Eeles RA      | 23535732  |

| SNP         | Chr      | Position  | Effect allele | Other allele | Info  | EAF   | No. cases/ No. controls | OR   | Lower CI | Upper CI | P        | Reference                       | PUBMED ID                          |
|-------------|----------|-----------|---------------|--------------|-------|-------|-------------------------|------|----------|----------|----------|---------------------------------|------------------------------------|
| rs115306967 | 6p21     | 32400939  | C             | G            | 0.997 | 0.334 | 4,599/2,941             | 0.90 | 0.84     | 0.97     | 0.003    | Al Olama A                      | 25217961                           |
| rs3096702   | 6p21.32  | 32192331  | G             | A            | 1     | 0.638 | 4,600/2,941             | 0.95 | 0.88     | 1.01     | 0.11     | Eeles RA                        | 23535732                           |
| rs130067    | 6p21.33  | 31118511  | G             | T            | 1     | 0.194 | 4,600/2,941             | 1.06 | 0.98     | 1.15     | 0.13     | Kote-Jarai Z                    | 21743467                           |
| rs115457135 | 6p22     | 30073776  | A             | G            | 0.966 | 0.201 | 4,599/2,941             | 1.06 | 0.97     | 1.15     | 0.20     | Al Olama A                      | 25217961                           |
| rs4713266   | 6p24     | 11219030  | T             | C            | 0.996 | 0.495 | 4,599/2,941             | 0.92 | 0.86     | 0.98     | 0.01     | Al Olama A                      | 25217961                           |
| rs9443189   | 6q14     | 76495882  | G             | A            | 0.997 | 0.152 | 4,599/2,940             | 0.83 | 0.76     | 0.92     | 0.0001   | Al Olama A                      | 25217961                           |
| rs2273669   | 6q21     | 109285189 | G             | A            | 1     | 0.144 | 4,600/2,941             | 1.10 | 1.01     | 1.21     | 0.04     | Eeles RA                        | 23535732                           |
| rs1933488   | 6q25.2   | 153441079 | G             | A            | 1     | 0.416 | 4,600/2,941             | 0.98 | 0.92     | 1.05     | 0.51     | Eeles RA                        | 23535732                           |
| rs651164    | 6q25.3   | 160581374 | G             | A            | 1     | 0.682 | 4,600/2,941             | 1.10 | 1.03     | 1.19     | 0.007    | Eeles RA,<br>Schumacher FR      | 19767753,<br>21743057              |
| rs9364554   | 6q25.3   | 160833664 | T             | C            | 1     | 0.270 | 4,600/2,941             | 1.22 | 1.13     | 1.31     | 9.35E-08 | Eeles RA                        | 18264097                           |
| rs56232506  | 7p12     | 47437244  | A             | G            | 0.993 | 0.452 | 4,600/2,941             | 1.09 | 1.02     | 1.17     | 0.008    | Al Olama A                      | 25217961                           |
| rs12155172  | 7p15.3   | 20994491  | G             | A            | 1     | 0.785 | 4,600/2,941             | 0.88 | 0.82     | 0.96     | 0.002    | Eeles RA                        | 23535732                           |
| rs6465657   | 7q21.3   | 97816327  | T             | C            | 1     | 0.542 | 4,600/2,941             | 0.93 | 0.88     | 1.00     | 0.04     | Eeles RA                        | 18264097                           |
| rs1512268   | 8p21.2   | 23526463  | C             | T            | 1     | 0.576 | 4,600/2,941             | 0.89 | 0.84     | 0.96     | 0.0010   | Eeles RA                        | 19767753                           |
| rs11135910  | 8p21.2   | 25892142  | T             | C            | 1     | 0.151 | 4,600/2,941             | 1.14 | 1.04     | 1.25     | 0.004    | Eeles RA                        | 23535732                           |
| rs16902094  | 8q24.21  | 128320346 | G             | A            | 0.986 | 0.139 | 4,599/2,941             | 1.08 | 0.98     | 1.19     | 0.11     | Gudmundsson J                   | 19767754                           |
| rs1016343   | 8q24.21  | 128093297 | T             | C            | 1     | 0.198 | 4,600/2,941             | 1.28 | 1.18     | 1.38     | 1.23E-09 | Schumacher FR                   | 21743057                           |
| rs16901979  | 8q24.21  | 128124916 | A             | C            | 1.000 | 0.029 | 4,600/2,941             | 1.65 | 1.39     | 1.95     | 5.45E-09 | Gudmundsson J                   | 17401366                           |
| rs445114    | 8q24.21  | 128323181 | C             | T            | 1     | 0.374 | 4,600/2,941             | 0.86 | 0.81     | 0.93     | 3.09E-05 | Gudmundsson J                   | 19767754                           |
| rs6983267   | 8q24.21  | 128413305 | T             | G            | 1     | 0.501 | 4,600/2,941             | 0.81 | 0.76     | 0.87     | 4.37E-10 | Yeager M, Thomas<br>G, Eeles RA | 17401363,<br>18264096,<br>18264097 |
| rs1447295   | 8q24.21  | 128485038 | C             | A            | 0.996 | 0.899 | 4,600/2,941             | 0.74 | 0.67     | 0.82     | 7.57E-09 | Gudmundsson J,<br>Yeager M      | 17401366,<br>17401363              |
| rs4242382   | 8q24.21  | 128517573 | G             | A            | 1     | 0.901 | 4,600/2,941             | 0.73 | 0.66     | 0.80     | 5.03E-10 | Thomas G                        | 18264096                           |
| rs4242384   | 8q24.21  | 128518554 | A             | C            | 1     | 0.902 | 4,600/2,941             | 0.73 | 0.66     | 0.80     | 5.46E-10 | Eeles RA,<br>Schumacher FR      | 18264097,<br>21743057              |
| rs17694493  | 9p21     | 22041998  | G             | C            | 0.942 | 0.143 | 4,599/2,941             | 1.08 | 0.98     | 1.18     | 0.12     | Al Olama A                      | 25217961                           |
| rs76934034  | 10q11    | 46082985  | C             | T            | 0.816 | 0.091 | 4,599/2,941             | 0.79 | 0.69     | 0.90     | 0.0005   | Al Olama A                      | 25217961                           |
| rs3123078   | 10q11.23 | 51524971  | T             | C            | 1     | 0.559 | 4,600/2,941             | 0.88 | 0.83     | 0.94     | 0.0002   | Eeles RA                        | 19767753                           |
| rs10993994  | 10q11.23 | 51549496  | C             | T            | 1     | 0.610 | 4,600/2,941             | 0.87 | 0.82     | 0.93     | 5.60E-05 | Thomas G, Eeles RA              | 18264096,                          |

| SNP        | Chr      | Position  | Effect allele | Other allele | Info  | EAF   | No. cases/ No. controls | OR   | Lower CI | Upper CI | P        | Reference                                    | PUBMED ID                          |
|------------|----------|-----------|---------------|--------------|-------|-------|-------------------------|------|----------|----------|----------|----------------------------------------------|------------------------------------|
|            |          |           |               |              |       |       |                         |      |          |          |          |                                              | 18264097                           |
| rs3850699  | 10q24.32 | 104414221 | G             | A            | 1     | 0.307 | 4,600/2,941             | 0.88 | 0.82     | 0.95     | 0.0009   | Eeles RA                                     | 23535732                           |
| rs7127900  | 11p15.5  | 2233574   | G             | A            | 1     | 0.804 | 4,600/2,941             | 0.92 | 0.85     | 1.00     | 0.05     | Eeles RA                                     | 19767753                           |
| rs11228565 | 11q13.3  | 68978580  | A             | G            | 1     | 0.202 | 4,600/2,941             | 1.15 | 1.06     | 1.24     | 0.0008   | Gudmundsson J                                | 19767754                           |
| rs7931342  | 11q13.3  | 68994497  | G             | T            | 1     | 0.505 | 4,600/2,941             | 1.15 | 1.08     | 1.23     | 3.05E-05 | Eeles RA                                     | 18264097                           |
| rs10896449 | 11q13.3  | 68994667  | G             | A            | 1     | 0.499 | 4,600/2,941             | 1.15 | 1.08     | 1.23     | 2.16E-05 | Thomas G                                     | 18264096                           |
| rs7130881  | 11q13.3  | 68995958  | G             | A            | 1     | 0.165 | 4,600/2,941             | 1.16 | 1.06     | 1.26     | 0.0007   | Eeles RA,<br>Schumacher FR                   | 19767753,<br>21743057              |
| rs11568818 | 11q22.2  | 102401661 | C             | T            | 1     | 0.458 | 4,600/2,941             | 0.93 | 0.87     | 0.99     | 0.03     | Eeles RA                                     | 23535732                           |
| rs11214775 | 11q23    | 113807181 | A             | G            | 1     | 0.297 | 4,600/2,941             | 0.92 | 0.86     | 0.99     | 0.03     | Al Olama A                                   | 25217961                           |
| rs80130819 | 12q13    | 48419618  | C             | A            | 0.986 | 0.097 | 4,599/2,941             | 0.80 | 0.71     | 0.90     | 0.0002   | Al Olama A                                   | 25217961                           |
| rs10875943 | 12q13.12 | 49676010  | C             | T            | 1     | 0.286 | 4,600/2,941             | 1.04 | 0.97     | 1.12     | 0.31     | Kote-Jarai Z                                 | 21743467                           |
| rs902774   | 12q13.13 | 53273904  | A             | G            | 1     | 0.144 | 4,600/2,941             | 1.20 | 1.10     | 1.32     | 6.36E-05 | Schumacher FR                                | 21743057                           |
| rs1270884  | 12q24.21 | 114685571 | G             | A            | 0.997 | 0.519 | 4,600/2,941             | 0.91 | 0.85     | 0.97     | 0.007    | Eeles RA                                     | 23535732                           |
| rs8008270  | 14q22.1  | 53372330  | C             | T            | 1     | 0.802 | 4,600/2,941             | 1.14 | 1.05     | 1.24     | 0.002    | Eeles RA                                     | 23535732                           |
| rs7153648  | 14q23    | 61122526  | G             | C            | 0.995 | 0.919 | 4,599/2,941             | 1.02 | 0.90     | 1.15     | 0.78     | Al Olama A                                   | 25217961                           |
| rs8014671  | 14q24    | 71092256  | A             | G            | 1     | 0.421 | 4,600/2,941             | 0.93 | 0.87     | 0.99     | 0.02     | Al Olama A                                   | 25217961                           |
| rs7141529  | 14q24.1  | 69126744  | C             | T            | 1     | 0.515 | 4,600/2,941             | 0.97 | 0.91     | 1.04     | 0.39     | Eeles RA                                     | 23535732                           |
| rs12051443 | 16q22    | 71691329  | A             | G            | 0.994 | 0.326 | 4,599/2,941             | 1.02 | 0.95     | 1.09     | 0.61     | Al Olama A                                   | 25217961                           |
| rs684232   | 17p13.3  | 618965    | C             | T            | 1     | 0.367 | 4,600/2,941             | 1.05 | 0.98     | 1.12     | 0.18     | Eeles RA                                     | 23535732                           |
| rs4430796  | 17q12    | 36098040  | A             | G            | 1     | 0.508 | 4,600/2,941             | 1.22 | 1.14     | 1.30     | 2.86E-09 | Gudmundsson J,<br>Thomas G                   | 17603485,<br>18264096              |
| rs7501939  | 17q12    | 36101156  | C             | T            | 1     | 0.586 | 4,600/2,941             | 1.21 | 1.13     | 1.29     | 2.22E-08 | Eeles RA                                     | 18264097                           |
| rs11650494 | 17q21.32 | 47345186  | A             | G            | 1     | 0.080 | 4,600/2,941             | 1.09 | 0.96     | 1.22     | 0.18     | Eeles RA                                     | 23535732                           |
| rs1859962  | 17q24.3  | 69108753  | T             | G            | 1     | 0.522 | 4,600/2,941             | 0.86 | 0.80     | 0.92     | 4.47E-06 | Gudmundsson J,<br>Eeles RA,<br>Schumacher FR | 17603485,<br>19767753,<br>21743057 |
| rs7241993  | 18q23    | 76773973  | T             | C            | 1     | 0.303 | 4,600/2,941             | 0.95 | 0.89     | 1.02     | 0.18     | Eeles RA                                     | 23535732                           |
| rs8102476  | 19q13.2  | 38735613  | T             | C            | 1     | 0.451 | 4,600/2,941             | 0.92 | 0.86     | 0.98     | 0.02     | Gudmundsson J                                | 19767754                           |
| rs11672691 | 19q13.2  | 41985587  | G             | A            | 1     | 0.738 | 4,600/2,941             | 1.10 | 1.02     | 1.19     | 0.01     | Amin Al Olama A                              | 23065704                           |
| rs2735839  | 19q13.33 | 51364623  | G             | A            | 0.992 | 0.853 | 4,600/2,940             | 1.11 | 1.01     | 1.21     | 0.04     | Eeles RA                                     | 18264097                           |

| SNP                                | Chr      | Position  | Effect allele | Other allele | Info  | EAF   | No. cases/ No. controls | OR   | Lower CI | Upper CI | P        | Reference     | PUBMED ID |
|------------------------------------|----------|-----------|---------------|--------------|-------|-------|-------------------------|------|----------|----------|----------|---------------|-----------|
| rs12480328                         | 20q13    | 49527922  | C             | T            | 1.000 | 0.077 | 4,600/2,940             | 0.86 | 0.75     | 0.97     | 0.02     | Al Olama A    | 25217961  |
| rs2427345                          | 20q13.33 | 61015611  | T             | C            | 1     | 0.376 | 4,600/2,941             | 0.98 | 0.91     | 1.04     | 0.47     | Eeles RA      | 23535732  |
| rs6062509                          | 20q13.33 | 62362563  | T             | G            | 1.000 | 0.687 | 4,600/2,941             | 1.09 | 1.01     | 1.17     | 0.02     | Eeles RA      | 23535732  |
| rs1041449                          | 21q22    | 42901421  | G             | A            | 1     | 0.440 | 4,600/2,941             | 1.07 | 1.00     | 1.14     | 0.05     | Al Olama A    | 25217961  |
| rs2238776                          | 22q11    | 19757892  | A             | G            | 0.991 | 0.221 | 4,600/2,941             | 0.88 | 0.81     | 0.95     | 0.002    | Al Olama A    | 25217961  |
| rs5759167                          | 22q13.2  | 43500212  | T             | G            | 1     | 0.514 | 4,600/2,941             | 0.84 | 0.79     | 0.90     | 2.97E-07 | Eeles RA      | 19767753  |
| rs2807031                          | Xp11     | 52896949  | T             | C            | 0.993 | 0.839 | 4,625/2,852             | 0.87 | 0.82     | 0.92     | 4.42E-06 | Al Olama A    | 25217961  |
| rs1327301                          | Xp11.22  | 51210057  | T             | C            | 0.995 | 0.348 | 4,625/2,853             | 1.10 | 1.05     | 1.16     | 9.77E-05 | Eeles RA      | 19767753  |
| rs5945572                          | Xp11.22  | 51229683  | G             | A            | 0.997 | 0.648 | 4,625/2,853             | 0.91 | 0.87     | 0.95     | 0.0001   | Gudmundsson J | 18264098  |
| rs5945619                          | Xp11.22  | 51241672  | T             | C            | 0.994 | 0.647 | 4,625/2,853             | 0.90 | 0.86     | 0.95     | 4.42E-05 | Eeles RA      | 18264097  |
| rs5919432                          | Xq12     | 67021550  | T             | C            | 0.995 | 0.795 | 4,625/2,853             | 1.04 | 0.98     | 1.10     | 0.18     | Kote-Jarai Z  | 21743467  |
| rs6625711                          | Xq13     | 70139850  | T             | A            | 0.706 | 0.599 | 4,625/2,853             | 0.95 | 0.91     | 1.00     | 0.07     | Al Olama A    | 25217961  |
| rs4844289                          | Xq13     | 70407983  | G             | A            | 0.995 | 0.387 | 4,625/2,853             | 1.03 | 0.98     | 1.08     | 0.19     | Al Olama A    | 25217961  |
| <b>Discovered in non-Europeans</b> |          |           |               |              |       |       |                         |      |          |          |          |               |           |
| rs13385191                         | 2p24.1   | 20888265  | G             | A            | 0.997 | 0.236 | 4,599/2,941             | 1.09 | 1.01     | 1.18     | 0.02     | Takata R      | 20676098  |
| rs9284813                          | 3p12.1   | 87152169  | G             | A            | 1     | 0.133 | 4,600/2,941             | 1.07 | 0.97     | 1.18     | 0.16     | Takata R      | 20676098  |
| rs12653946                         | 5p15.33  | 1895829   | T             | C            | 1     | 0.412 | 4,600/2,941             | 1.14 | 1.07     | 1.22     | 8.67E-05 | Takata R      | 20676098  |
| rs1983891                          | 6p21.1   | 41536427  | T             | C            | 1.000 | 0.269 | 4,600/2,941             | 1.14 | 1.06     | 1.22     | 0.0006   | Takata R      | 20676098  |
| rs339331                           | 6q22.1   | 117210052 | C             | T            | 1     | 0.310 | 4,600/2,941             | 0.92 | 0.85     | 0.98     | 0.02     | Takata R      | 20676098  |
| rs1512268                          | 8p21.2   | 23526463  | C             | T            | 1     | 0.576 | 4,600/2,941             | 0.89 | 0.84     | 0.96     | 0.0010   | Takata R      | 20676098  |
| rs1456315                          | 8q24.21  | 128103937 | C             | T            | 1     | 0.681 | 4,600/2,941             | 0.91 | 0.85     | 0.97     | 0.005    | Xu J          | 23023329  |
| rs1456315                          | 8q24.21  | 128103937 | C             | T            | 1     | 0.681 | 4,600/2,941             | 0.91 | 0.85     | 0.97     | 0.005    | Takata R      | 20676098  |
| rs7837688                          | 8q24.21  | 128539360 | G             | T            | 0.997 | 0.902 | 4,600/2,940             | 0.73 | 0.66     | 0.80     | 5.58E-10 | Takata R      | 20676098  |
| rs817826                           | 9q31.2   | 110156300 | T             | C            | 1     | 0.858 | 4,600/2,941             | 1.01 | 0.92     | 1.11     | 0.82     | Xu J          | 23023329  |
| rs10993994                         | 10q11.23 | 51549496  | C             | T            | 1     | 0.610 | 4,600/2,941             | 0.87 | 0.82     | 0.93     | 5.60E-05 | Takata R      | 20676098  |
| rs9600079                          | 13q22.1  | 73728139  | T             | G            | 1     | 0.444 | 4,600/2,941             | 1.02 | 0.95     | 1.09     | 0.57     | Takata R      | 20676098  |
| rs7501939                          | 17q12    | 36101156  | C             | T            | 1     | 0.586 | 4,600/2,941             | 1.21 | 1.13     | 1.29     | 2.22E-08 | Takata R      | 20676098  |
| rs103294                           | 19q13.42 | 54797848  | T             | C            | 1     | 0.207 | 4,600/2,941             | 0.99 | 0.91     | 1.07     | 0.74     | Xu J          | 23023329  |

**Supplementary Table 3.** Meta-analysis results of promising SNPs from stage 1 selected for rapid replication

| SNP        | Chr      | Position <sup>a</sup> | Effect allele | Other allele    | Stage               | EAF <sup>b</sup> | No. cases / no. controls | OR                 | 95% CI             | P               | P <sub>heterogeneity</sub> <sup>c</sup> |
|------------|----------|-----------------------|---------------|-----------------|---------------------|------------------|--------------------------|--------------------|--------------------|-----------------|-----------------------------------------|
| rs2016546  | 15q15.1  | 41,056,440            | T             | G               | Stage 1             | 0.01             | 4389/2924                | 1.99               | (1.51-2.62)        | 5.58E-07        |                                         |
|            |          |                       |               |                 | Stage 2             | 0.01             | 2342/2409                | 0.66               | (0.43-1.01)        | 0.06            |                                         |
|            |          |                       |               |                 | Replication - FHCRC | 0.03             | 1311/1150                | 1.54               | (1.13-2.11)        | 6.16E-03        |                                         |
|            |          |                       |               |                 | <b>Combined</b>     |                  | <b>8042/6483</b>         | <b>1.48</b>        | <b>(1.22-1.78)</b> | <b>4.19E-05</b> |                                         |
| rs1635554  | 12q13.11 | 48,374,513            | T             | C               | Stage 1             | 0.11             | 4583/2926                | 0.77               | (0.69-0.86)        | 4.90E-06        |                                         |
|            |          |                       |               |                 | Stage 2             | 0.11             | 2487/2524                | 0.93               | (0.82-1.06)        | 0.29            |                                         |
|            |          |                       |               |                 | Replication - FHCRC | 0.09             | 1309/1144                | 1.01               | (0.83-1.23)        | 0.93            |                                         |
|            |          |                       |               |                 | Replication - AHS   | 0.09             | 574/1157                 | 0.85               | (0.66-1.10)        | 0.21            |                                         |
|            |          |                       |               | <b>Combined</b> |                     | <b>8953/7751</b> | <b>0.86</b>              | <b>(0.80-0.93)</b> | <b>7.16E-05</b>    | <b>0.05</b>     |                                         |
| rs10180155 | 2q22.1   | 141,038,006           | A             | G               | Stage 1             | 0.01             | 4586/2937                | 1.77               | (1.37-2.28)        | 1.07E-05        |                                         |
|            |          |                       |               |                 | Stage 2             | 0.02             | 2475/2513                | 1.27               | (0.97-1.66)        | 0.08            |                                         |
|            |          |                       |               |                 | Replication - FHCRC | 0.02             | 1313/1152                | 1.08               | (0.76-1.54)        | 0.67            |                                         |
|            |          |                       |               |                 | Replication - MEC   | 0.02             | 750/733                  | 0.66               | (0.39-1.12)        | 0.12            |                                         |
|            |          |                       |               |                 | Replication - AHS   | 0.01             | 577/1166                 | 1.41               | (0.81-2.45)        | 0.22            |                                         |
|            |          |                       |               | <b>Combined</b> |                     | <b>9701/8501</b> | <b>1.32</b>              | <b>(1.14-1.54)</b> | <b>3.12E-04</b>    | <b>0.01</b>     |                                         |
| rs2728945  | 3p25.3   | 9,418,510             | A             | G               | Stage 1             | 0.14             | 4566/2936                | 1.24               | (1.13-1.36)        | 5.43E-06        |                                         |
|            |          |                       |               |                 | Stage 2             | 0.17             | 2484/2532                | 1.01               | (0.91-1.12)        | 0.89            |                                         |
|            |          |                       |               |                 | Replication - FHCRC | 0.15             | 1305/1145                | 0.90               | (0.77-1.06)        | 0.22            |                                         |
|            |          |                       |               |                 | Replication - AHS   | 0.15             | 574/1167                 | 1.24               | (1.03-1.50)        | 0.02            |                                         |
|            |          |                       |               | <b>Combined</b> |                     | <b>8929/7780</b> | <b>1.11</b>              | <b>(1.04-1.17)</b> | <b>9.86E-04</b>    | <b>0.0009</b>   |                                         |
| rs4624886  | 6q23.3   | 138,341,562           | C             | A               | Stage 1             | 0.21             | 4562/2921                | 0.83               | (0.76-0.90)        | 7.86E-06        |                                         |
|            |          |                       |               |                 | Stage 2             | 0.20             | 2486/2520                | 0.98               | (0.89-1.08)        | 0.72            |                                         |
|            |          |                       |               |                 | Replication - FHCRC | 0.20             | 1303/1150                | 0.93               | (0.81-1.07)        | 0.32            |                                         |
|            |          |                       |               |                 | Replication - MEC   | 0.19             | 740/731                  | 1.00               | (0.83-1.20)        | 0.98            |                                         |
|            |          |                       |               |                 | Replication - AHS   | 0.19             | 573/1160                 | 1.04               | (0.87-1.24)        | 0.70            |                                         |
|            |          |                       |               | <b>Combined</b> |                     | <b>9664/8482</b> | <b>0.92</b>              | <b>(0.87-0.97)</b> | <b>0.001</b>       | <b>0.03</b>     |                                         |
| rs5979202  | Xp22.2   | 9,871,958             | A             | G               | Stage 1             | 0.17             | 4342/2920                | 0.78               | (0.71-0.86)        | 6.82E-07        |                                         |
|            |          |                       |               |                 | Stage 2             | 0.34             | 2482/2516                | 0.95               | (0.90-1.01)        | 0.10            |                                         |
|            |          |                       |               |                 | Replication - FHCRC | 0.35             | 1312/1148                | 1.03               | (0.95-1.12)        | 0.50            |                                         |
|            |          |                       |               |                 | Replication - MEC   | 0.36             | 747/734                  | 0.98               | (0.88-1.09)        | 0.76            |                                         |
|            |          |                       |               |                 | Replication - AHS   | 0.33             | 577/1167                 | 0.92               | (0.83-1.03)        | 0.14            |                                         |

| SNP                 | Chr     | Position <sup>a</sup> | Effect allele | Other allele | Stage               | EAF <sup>b</sup> | No. cases / no. controls | OR          | 95% CI             | P            | P <sub>heterogeneity</sub> <sup>c</sup> |
|---------------------|---------|-----------------------|---------------|--------------|---------------------|------------------|--------------------------|-------------|--------------------|--------------|-----------------------------------------|
| rs79450105          | 8q12.3  | 63,338,261            | C             | T            | <b>Combined</b>     |                  | <b>9460/8485</b>         | <b>0.94</b> | <b>(0.91-0.98)</b> | <b>0.001</b> | <b>0.0006</b>                           |
|                     |         |                       |               |              | Stage 1             | 0.05             | 4547/2917                | 1.40        | (1.21-1.61)        | 4.93E-06     |                                         |
|                     |         |                       |               |              | Stage 2             | 0.05             | 2479/2520                | 0.93        | (0.78-1.12)        | 0.46         |                                         |
|                     |         |                       |               |              | Replication - FHCRC | 0.07             | 1310/1148                | 1.11        | (0.89-1.37)        | 0.35         |                                         |
|                     |         |                       |               |              | Replication - MEC   | 0.07             | 749/734                  | 1.07        | (0.80-1.43)        | 0.66         |                                         |
|                     |         |                       |               |              | Replication - AHS   | 0.06             | 579/1170                 | 1.09        | (0.81-1.47)        | 0.56         |                                         |
| rs314739            | 5p15.2  | 10,040,199            | T             | C            | <b>Combined</b>     |                  | <b>9664/8489</b>         | <b>1.16</b> | <b>(1.06-1.27)</b> | <b>0.001</b> | <b>0.01</b>                             |
|                     |         |                       |               |              | Stage 1             | 0.45             | 4586/2931                | 1.16        | (1.08-1.24)        | 1.43E-05     |                                         |
|                     |         |                       |               |              | Stage 2             | 0.47             | 2344/2391                | 1.04        | (0.96-1.13)        | 0.36         |                                         |
|                     |         |                       |               |              | Replication - FHCRC | 0.49             | 1305/1149                | 0.92        | (0.82-1.02)        | 0.12         |                                         |
|                     |         |                       |               |              | Replication - MEC   | 0.50             | 748/735                  | 1.00        | (0.86-1.15)        | 0.97         |                                         |
|                     |         |                       |               |              | Replication - AHS   | 0.46             | 554/1134                 | 1.08        | (0.94-1.25)        | 0.27         |                                         |
| rs2099817           | 15q26.2 | 98,217,064            | G             | T            | <b>Combined</b>     |                  | <b>9537/8340</b>         | <b>1.07</b> | <b>(1.02-1.11)</b> | <b>0.003</b> | <b>0.006</b>                            |
|                     |         |                       |               |              | Stage 1             | 0.47             | 4466/2901                | 0.86        | (0.80-0.92)        | 8.42E-06     |                                         |
|                     |         |                       |               |              | Stage 2             | 0.46             | 2480/2524                | 0.98        | (0.91-1.06)        | 0.68         |                                         |
|                     |         |                       |               |              | Replication - FHCRC | 0.49             | 1312/1149                | 1.02        | (0.91-1.14)        | 0.77         |                                         |
|                     |         |                       |               |              | Replication - MEC   | 0.48             | 747/733                  | 1.05        | (0.91-1.21)        | 0.50         |                                         |
|                     |         |                       |               |              | Replication - AHS   | 0.47             | 574/1162                 | 0.97        | (0.84-1.13)        | 0.71         |                                         |
| rs4430089           | 8q12.3  | 63,372,633            | A             | G            | <b>Combined</b>     |                  | <b>9579/8469</b>         | <b>0.94</b> | <b>(0.90-0.98)</b> | <b>0.004</b> | <b>0.01</b>                             |
|                     |         |                       |               |              | Stage 1             | 0.05             | 4599/2941                | 1.37        | (1.19-1.58)        | 1.53E-05     |                                         |
|                     |         |                       |               |              | Stage 2             | 0.05             | 2477/2518                | 0.92        | (0.77-1.10)        | 0.35         |                                         |
|                     |         |                       |               |              | Replication - FHCRC | 0.07             | 1313/1151                | 1.08        | (0.87-1.33)        | 0.50         |                                         |
|                     |         |                       |               |              | Replication - AHS   | 0.05             | 571/1159                 | 1.07        | (0.78-1.47)        | 0.67         |                                         |
|                     |         |                       |               |              | <b>Combined</b>     |                  | <b>8960/7769</b>         | <b>1.14</b> | <b>(1.04-1.26)</b> | <b>0.005</b> |                                         |
| Stage 1             | 0.52    | 4581/2927             | 0.86          | (0.81-0.92)  | 1.16E-05            |                  |                          |             |                    |              |                                         |
| Stage 2             | 0.49    | 2468/2506             | 1.00          | (0.92-1.08)  | 0.98                |                  |                          |             |                    |              |                                         |
| Replication - FHCRC | 0.51    | 1304/1146             | 1.03          | (0.92-1.15)  | 0.57                |                  |                          |             |                    |              |                                         |
| Replication - MEC   | 0.49    | 746/731               | 1.04          | (0.91-1.20)  | 0.55                |                  |                          |             |                    |              |                                         |
| Replication - AHS   | 0.50    | 570/1159              | 0.97          | (0.84-1.11)  | 0.63                |                  |                          |             |                    |              |                                         |
| rs79608926          | 11q24.1 | 123,704,705           | T             | G            | <b>Combined</b>     |                  | <b>9669/8469</b>         | <b>0.95</b> | <b>(0.91-0.99)</b> | <b>0.01</b>  | <b>0.008</b>                            |
|                     |         |                       |               |              | Stage 1             | 0.19             | 4595/2932                | 0.82        | (0.75-0.90)        | 9.20E-06     |                                         |
|                     |         |                       |               |              | Stage 2             | 0.17             | 2478/2530                | 1.06        | (0.96-1.18)        | 0.26         |                                         |

| SNP        | Chr    | Position <sup>a</sup> | Effect allele | Other allele | Stage               | EAF <sup>b</sup> | No. cases / no. controls | OR          | 95% CI             | P           | P <sub>heterogeneity</sub> <sup>c</sup> |
|------------|--------|-----------------------|---------------|--------------|---------------------|------------------|--------------------------|-------------|--------------------|-------------|-----------------------------------------|
| rs78425081 | 3p14.1 | 65,318,721            | T             | G            | Replication - FHCRC | 0.15             | 1308/1151                | 1.08        | (0.93-1.26)        | 0.30        | <b>0.001</b>                            |
|            |        |                       |               |              | Replication - MEC   | 0.17             | 750/733                  | 0.98        | (0.81-1.19)        | 0.84        |                                         |
|            |        |                       |               |              | Replication - AHS   | 0.17             | 575/1171                 | 0.89        | (0.73-1.08)        | 0.24        |                                         |
|            |        |                       |               |              | <b>Combined</b>     |                  | <b>9706/8517</b>         | <b>0.94</b> | <b>(0.89-0.99)</b> | <b>0.02</b> |                                         |
|            |        |                       |               |              | Stage 1             | 0.06             | 4600/2937                | 0.72        | (0.62-0.84)        | 1.43E-05    |                                         |
|            |        |                       |               |              | Stage 2             | 0.07             | 2487/2527                | 0.98        | (0.84-1.15)        | 0.83        |                                         |
|            |        |                       |               |              | Replication - FHCRC | 0.06             | 1315/1149                | 0.93        | (0.74-1.18)        | 0.56        |                                         |
|            |        |                       |               |              | Replication - MEC   | 0.05             | 750/733                  | 1.34        | (0.97-1.85)        | 0.08        |                                         |
|            |        |                       |               |              | Replication - AHS   | 0.05             | 576/1161                 | 1.27        | (0.94-1.72)        | 0.12        |                                         |
| rs74526871 | 7q31.2 | 114,865,325           | A             | G            | <b>Combined</b>     |                  | <b>9728/8507</b>         | <b>0.91</b> | <b>(0.83-1.00)</b> | <b>0.04</b> | <b>0.0004</b>                           |
|            |        |                       |               |              | Stage 1             | 0.03             | 4584/2925                | 0.61        | (0.49-0.76)        | 9.00E-06    |                                         |
|            |        |                       |               |              | Stage 2             | 0.02             | 2495/2529                | 1.21        | (0.94-1.56)        | 0.14        |                                         |
|            |        |                       |               |              | Replication - FHCRC | 0.02             | 1310/1150                | 1.18        | (0.79-1.78)        | 0.42        |                                         |
|            |        |                       |               |              | Replication - MEC   | 0.01             | 749/733                  | 2.14        | (1.15-3.99)        | 0.01        |                                         |
|            |        |                       |               |              | Replication - AHS   | 0.02             | 579/1172                 | 0.72        | (0.42-1.24)        | 0.24        |                                         |
|            |        |                       |               |              | <b>Combined</b>     |                  | <b>9717/8509</b>         | <b>0.90</b> | <b>(0.78-1.03)</b> | <b>0.13</b> |                                         |
|            |        |                       |               |              | Stage 1             | 0.06             | 4379/2854                | 0.65        | (0.56-0.76)        | 2.11E-08    |                                         |
|            |        |                       |               |              | Stage 2             | 0.12             | 2475/2530                | 1.05        | (0.97-1.14)        | 0.25        |                                         |
| rs2075596  | Xq28   | 153,297,392           | A             | G            | Replication - FHCRC | 0.14             | 1304/1147                | 0.92        | (0.82-1.03)        | 0.15        | <b>1.90E-05</b>                         |
|            |        |                       |               |              | Replication - MEC   | 0.16             | 747/734                  | 1.10        | (0.96-1.26)        | 0.16        |                                         |
|            |        |                       |               |              | Replication - AHS   | 0.12             | 574/1166                 | 0.96        | (0.82-1.12)        | 0.60        |                                         |
|            |        |                       |               |              | <b>Combined</b>     |                  | <b>9479/8431</b>         | <b>0.96</b> | <b>(0.91-1.01)</b> | <b>0.14</b> |                                         |
|            |        |                       |               |              | Stage 1             | 0.06             | 4379/2854                | 0.65        | (0.56-0.76)        | 2.11E-08    |                                         |
|            |        |                       |               |              | Stage 2             | 0.12             | 2475/2530                | 1.05        | (0.97-1.14)        | 0.25        |                                         |
|            |        |                       |               |              | Replication - FHCRC | 0.14             | 1304/1147                | 0.92        | (0.82-1.03)        | 0.15        |                                         |
|            |        |                       |               |              | Replication - MEC   | 0.16             | 747/734                  | 1.10        | (0.96-1.26)        | 0.16        |                                         |
|            |        |                       |               |              | Replication - AHS   | 0.12             | 574/1166                 | 0.96        | (0.82-1.12)        | 0.60        |                                         |
| rs12013494 | Xq28   | 150,911,107           | A             | G            | <b>Combined</b>     |                  | <b>9479/8431</b>         | <b>0.96</b> | <b>(0.91-1.01)</b> | <b>0.14</b> | <b>6.50E-07</b>                         |
|            |        |                       |               |              | Stage 1             | 0.04             | 4407/2873                | 0.66        | (0.54-0.79)        | 1.28E-05    |                                         |
|            |        |                       |               |              | Stage 2             | 0.07             | 2487/2517                | 0.95        | (0.85-1.06)        | 0.37        |                                         |
|            |        |                       |               |              | Replication - FHCRC | 0.09             | 1310/1150                | 0.98        | (0.86-1.13)        | 0.81        |                                         |
|            |        |                       |               |              | Replication - MEC   | 0.10             | 749/733                  | 1.08        | (0.91-1.28)        | 0.37        |                                         |
|            |        |                       |               |              | Replication - AHS   | 0.08             | 571/1149                 | 1.18        | (0.99-1.40)        | 0.06        |                                         |
|            |        |                       |               |              | <b>Combined</b>     |                  | <b>9524/8422</b>         | <b>0.96</b> | <b>(0.90-1.03)</b> | <b>0.27</b> |                                         |
|            |        |                       |               |              | Stage 1             | 0.04             | 4407/2873                | 0.66        | (0.54-0.79)        | 1.28E-05    |                                         |
|            |        |                       |               |              | Stage 2             | 0.07             | 2487/2517                | 0.95        | (0.85-1.06)        | 0.37        |                                         |

<sup>a</sup>Position based on GRCh37/hg19

<sup>b</sup>EAF: Effect allele frequency

<sup>c</sup>P-value for the heterogeneity between studies

**Supplementary Table 4.** Association results for 13 previously reported loci that reach genome-wide significance ( $P < 5 \times 10^{-8}$ ) in the combined meta-analysis

| SNP        | Chr      | Position    | Nearest gene(s)           | Effect allele <sup>a</sup> | Other allele | Stage           | No. cases/<br>no. controls | EAF <sup>b</sup> | OR          | 95% CI             | P               |
|------------|----------|-------------|---------------------------|----------------------------|--------------|-----------------|----------------------------|------------------|-------------|--------------------|-----------------|
| rs4242382  | 8q24.21  | 128,517,573 | <i>LOC727677, CASC8</i>   | G                          | A            | Stage 1         | 4600/2941                  | 0.90             | 0.73        | (0.66-0.80)        | 5.03E-10        |
|            |          |             |                           |                            |              | Stage 2         | 6573/6387                  | 0.90             | 0.68        | (0.63-0.74)        | 3.77E-22        |
|            |          |             |                           |                            |              | Stage 3         | 1204/1231                  | 0.90             | 0.67        | (0.56-0.80)        | 6.64E-06        |
|            |          |             |                           |                            |              | <b>Combined</b> | <b>12377/10559</b>         |                  | <b>0.69</b> | <b>(0.65-0.74)</b> | <b>1.48E-34</b> |
| rs8064454  | 17q12    | 36,101,586  | <i>HNF1B</i>              | C                          | A            | Stage 1         | 4600/2941                  | 0.51             | 1.24        | (1.16-1.32)        | 2.64E-10        |
|            |          |             |                           |                            |              | Stage 2         | 6553/6379                  | 0.52             | 1.22        | (1.16-1.28)        | 7.35E-15        |
|            |          |             |                           |                            |              | Stage 3         | 1203/1230                  | 0.50             | 1.36        | (1.21-1.53)        | 2.37E-07        |
|            |          |             |                           |                            |              | <b>Combined</b> | <b>12356/10550</b>         |                  | <b>1.24</b> | <b>(1.19-1.29)</b> | <b>8.03E-29</b> |
| rs17765344 | 17q24.3  | 69,106,874  | <i>BC039327, CASC17</i>   | G                          | A            | Stage 1         | 4600/2941                  | 0.52             | 0.86        | (0.80-0.91)        | 3.00E-06        |
|            |          |             |                           |                            |              | Stage 2         | 6569/6387                  | 0.52             | 0.84        | (0.80-0.88)        | 7.26E-13        |
|            |          |             |                           |                            |              | Stage 3         | 1203/1230                  | 0.52             | 0.78        | (0.70-0.88)        | 3.04E-05        |
|            |          |             |                           |                            |              | <b>Combined</b> | <b>12372/10558</b>         |                  | <b>0.84</b> | <b>(0.81-0.87)</b> | <b>4.28E-21</b> |
| rs5759167  | 22q13.2  | 43,500,212  | <i>BIK</i>                | T                          | G            | Stage 1         | 4600/2941                  | 0.51             | 0.84        | (0.79-0.90)        | 2.97E-07        |
|            |          |             |                           |                            |              | Stage 2         | 6571/6384                  | 0.50             | 0.87        | (0.83-0.91)        | 1.53E-08        |
|            |          |             |                           |                            |              | Stage 3         | 1204/1231                  | 0.51             | 0.82        | (0.74-0.92)        | 0.0009          |
|            |          |             |                           |                            |              | <b>Combined</b> | <b>12375/10556</b>         |                  | <b>0.85</b> | <b>(0.82-0.89)</b> | <b>1.40E-16</b> |
| rs10993994 | 10q11.23 | 51,549,496  | <i>PARG, TIMM23, MSMB</i> | C                          | T            | Stage 1         | 4600/2941                  | 0.61             | 0.87        | (0.82-0.93)        | 5.60E-05        |
|            |          |             |                           |                            |              | Stage 2         | 6568/6388                  | 0.61             | 0.84        | (0.80-0.88)        | 9.92E-12        |
|            |          |             |                           |                            |              | Stage 3         | 1204/1231                  | 0.58             | 0.90        | (0.80-1.01)        | 0.07            |
|            |          |             |                           |                            |              | <b>Combined</b> | <b>12372/10560</b>         |                  | <b>0.86</b> | <b>(0.83-0.89)</b> | <b>1.05E-15</b> |
| rs71277158 | 3q26.2   | 169,999,216 | <i>PRKCI</i>              | G                          | T            | Stage 1         | 4600/2941                  | 0.17             | 0.79        | (0.72-0.87)        | 5.75E-07        |
|            |          |             |                           |                            |              | Stage 2         | 6574/6391                  | 0.18             | 0.84        | (0.78-0.89)        | 1.09E-07        |
|            |          |             |                           |                            |              | Stage 3         | 1203/1230                  | 0.18             | 0.85        | (0.72-1.00)        | 0.05            |
|            |          |             |                           |                            |              | <b>Combined</b> | <b>12377/10562</b>         |                  | <b>0.82</b> | <b>(0.78-0.87)</b> | <b>8.22E-14</b> |
| rs7929962  | 11q13.3  | 68,985,583  | <i>LOC338694, MYEOV</i>   | T                          | C            | Stage 1         | 4600/2941                  | 0.50             | 1.16        | (1.08-1.23)        | 1.74E-05        |
|            |          |             |                           |                            |              | Stage 2         | 6561/6385                  | 0.51             | 1.13        | (1.08-1.19)        | 3.79E-07        |
|            |          |             |                           |                            |              | Stage 3         | 1204/1231                  | 0.53             | 1.21        | (1.08-1.36)        | 0.001           |
|            |          |             |                           |                            |              | <b>Combined</b> | <b>12365/10557</b>         |                  | <b>1.15</b> | <b>(1.11-1.19)</b> | <b>2.37E-13</b> |
| rs7758229  | 6q25.3   | 160,840,252 | <i>SLC22A3</i>            | T                          | G            | Stage 1         | 4600/2941                  | 0.31             | 1.19        | (1.11-1.27)        | 7.16E-07        |



| SNP        | Chr      | Position    | Nearest gene(s)            | Effect allele <sup>a</sup> | Other allele | Stage           | No. cases/<br>no. controls | EAF <sup>b</sup> | OR          | 95% CI             | P               |
|------------|----------|-------------|----------------------------|----------------------------|--------------|-----------------|----------------------------|------------------|-------------|--------------------|-----------------|
| rs2430386  | 2p15     | 63,178,111  | <i>EHBP1</i>               | T                          | C            | Stage 2         | 6566/6381                  | 0.31             | 1.14        | (1.08-1.20)        | 1.77E-06        |
|            |          |             |                            |                            |              | Stage 3         | 1204/1231                  | 0.32             | 1.10        | (0.97-1.24)        | 0.13            |
|            |          |             |                            |                            |              | <b>Combined</b> | <b>12370/10553</b>         |                  | <b>1.15</b> | <b>(1.10-1.20)</b> | <b>4.40E-12</b> |
|            |          |             |                            |                            |              | Stage 1         | 4600/2941                  | 0.50             | 1.14        | (1.07-1.22)        | 6.81E-05        |
|            |          |             |                            |                            |              | Stage 2         | 6400/6306                  | 0.50             | 1.15        | (1.10-1.21)        | 1.41E-08        |
| rs17023900 | 3p12.1   | 87,134,800  | <i>LINC00506, BC050344</i> | G                          | A            | Stage 3         | 1204/1231                  | 0.51             | 1.05        | (0.94-1.18)        | 0.40            |
|            |          |             |                            |                            |              | <b>Combined</b> | <b>12204/10478</b>         |                  | <b>1.14</b> | <b>(1.10-1.18)</b> | <b>9.04E-12</b> |
|            |          |             |                            |                            |              | Stage 1         | 4600/2941                  | 0.08             | 1.17        | (1.04-1.31)        | 0.009           |
|            |          |             |                            |                            |              | Stage 2         | 6534/6357                  | 0.07             | 1.29        | (1.18-1.42)        | 1.19E-08        |
|            |          |             |                            |                            |              | Stage 3         | 1204/1231                  | 0.07             | 1.38        | (1.12-1.70)        | 0.003           |
| rs7725218  | 5p15.33  | 1,282,414   | <i>TERT,hTERT</i>          | A                          | G            | Stage 3         | 1203/1230                  | 0.38             | 0.90        | (0.78-1.02)        | 0.10            |
|            |          |             |                            |                            |              | <b>Combined</b> | <b>12297/10489</b>         |                  | <b>0.87</b> | <b>(0.84-0.91)</b> | <b>3.08E-11</b> |
|            |          |             |                            |                            |              | Stage 1         | 4600/2941                  | 0.35             | 0.88        | (0.82-0.94)        | 0.0003          |
|            |          |             |                            |                            |              | Stage 2         | 6494/6318                  | 0.36             | 0.87        | (0.83-0.92)        | 9.99E-08        |
|            |          |             |                            |                            |              | Stage 3         | 1203/1230                  | 0.38             | 0.90        | (0.78-1.02)        | 0.10            |
| rs10774740 | 12q24.21 | 114,666,202 | <i>TBX5</i>                | T                          | G            | Stage 3         | 1203/1231                  | 0.39             | 0.87        | (0.77-0.98)        | 0.03            |
|            |          |             |                            |                            |              | <b>Combined</b> | <b>12368/10558</b>         |                  | <b>0.88</b> | <b>(0.85-0.92)</b> | <b>2.60E-10</b> |
|            |          |             |                            |                            |              | Stage 1         | 4600/2941                  | 0.39             | 0.87        | (0.82-0.94)        | 0.0001          |
|            |          |             |                            |                            |              | Stage 2         | 6565/6386                  | 0.40             | 0.89        | (0.85-0.94)        | 6.18E-06        |
|            |          |             |                            |                            |              | Stage 3         | 1203/1231                  | 0.39             | 0.87        | (0.77-0.98)        | 0.03            |
| rs7679673  | 4q24     | 106,061,534 | <i>TET2</i>                | A                          | C            | Stage 3         | 1203/1230                  | 0.41             | 0.92        | (0.82-1.03)        | 0.15            |
|            |          |             |                            |                            |              | <b>Combined</b> | <b>12337/10546</b>         |                  | <b>0.89</b> | <b>(0.86-0.93)</b> | <b>4.03E-09</b> |
|            |          |             |                            |                            |              | Stage 1         | 4600/2941                  | 0.42             | 0.86        | (0.81-0.92)        | 1.06E-05        |
|            |          |             |                            |                            |              | Stage 2         | 6534/6375                  | 0.42             | 0.91        | (0.86-0.95)        | 0.0001          |
|            |          |             |                            |                            |              | Stage 3         | 1203/1230                  | 0.41             | 0.92        | (0.82-1.03)        | 0.15            |

<sup>a</sup>Effect allele is the allele associated with the change in risk

<sup>b</sup>Frequency of the effect allele

**Supplementary Table 5.** New suggestive loci associated with prostate risk ( $P < 5 \times 10^{-7}$ )

| SNP        | Chr     | Position   | Nearest gene | Risk allele <sup>a</sup> | Other allele | Stage           | RAF <sup>b</sup> | No. cases/<br>no. controls | OR          | 95% CI             | P               |
|------------|---------|------------|--------------|--------------------------|--------------|-----------------|------------------|----------------------------|-------------|--------------------|-----------------|
| rs12597458 | 16q22.2 | 72,030,970 | PKD1L3       | G                        | T            | Stage 1         | 0.55             | 4600/2941                  | 1.11        | (1.04-1.19)        | 0.001           |
|            |         |            |              |                          |              | Stage 2         | 0.56             | 6574/6390                  | 1.09        | (1.04-1.15)        | 4.16E-04        |
|            |         |            |              |                          |              | Stage 3         | 0.55             | 1203/1230                  | 1.16        | (1.04-1.32)        | 0.01            |
|            |         |            |              |                          |              | <b>Combined</b> |                  | <b>12377/10561</b>         | <b>1.11</b> | <b>(1.06-1.15)</b> | <b>9.67E-08</b> |
| rs12198220 | 6p22.3  | 21,330,293 | CDKAL1       | T                        | G            | Stage 1         | 0.74             | 4600/2941                  | 1.12        | (1.03-1.20)        | 0.005           |
|            |         |            |              |                          |              | Stage 2         | 0.74             | 6563/6383                  | 1.10        | (1.04-1.16)        | 0.002           |
|            |         |            |              |                          |              | Stage 3         | 0.71             | 1203/1230                  | 1.28        | (1.12-1.46)        | 2.40E-04        |
|            |         |            |              |                          |              | <b>Combined</b> |                  | <b>12366/10554</b>         | <b>1.12</b> | <b>(1.07-1.17)</b> | <b>2.13E-07</b> |

<sup>a</sup>Risk allele is the allele associated with an increased risk of prostate cancer

<sup>b</sup>Frequency of the risk allele

**Supplementary Table 6.** Association results from stage 1 for SNPs previously reported to be associated with aggressive prostate cancer

| SNP        | Chr     | Position  | Effect allele <sup>a</sup> /<br>Other allele | EAF <sup>b</sup> | Info <sup>c</sup> | Case-Only Analysis of Gleason Score (continuous trait) |        |       |      | Case-Control Analysis of Aggressive Prostate Cancer (Gleason $\geq$ 8 vs. controls) |      |             |      | Reference                |
|------------|---------|-----------|----------------------------------------------|------------------|-------------------|--------------------------------------------------------|--------|-------|------|-------------------------------------------------------------------------------------|------|-------------|------|--------------------------|
|            |         |           |                                              |                  |                   | No. of cases                                           | Beta   | SE    | P    | No. of cases/<br>No. of controls                                                    | OR   | 95% CI      | P    |                          |
| rs11199874 | 10q26   | 123032519 | G/A                                          | 0.73             | 0.991             | 4545                                                   | -0.003 | 0.025 | 0.89 | 422/2941                                                                            | 1.01 | (0.86-1.20) | 0.87 | Nam et al. (2011)        |
| rs6497287  | 15q13   | 28440287  | C/T                                          | 0.07             | 1                 | 4545                                                   | 0.007  | 0.041 | 0.86 | 423/2941                                                                            | 1.26 | (0.94-1.68) | 0.12 | FitzGerald et al. (2011) |
| rs4775302  | 15q21   | 46639808  | A/G                                          | 0.55             | 0.996             | 4544                                                   | -0.007 | 0.021 | 0.74 | 422/2941                                                                            | 0.92 | (0.79-1.06) | 0.25 | Nam et al. (2011)        |
| rs4054823  | 17p12   | 13625024  | T/C                                          | 0.53             | 1                 | 4545                                                   | -0.022 | 0.021 | 0.31 | 423/2941                                                                            | 0.83 | (0.71-0.96) | 0.01 | Xu et al. (2010)         |
| rs11672691 | 19q13.2 | 41985587  | G/A                                          | 0.74             | 1                 | 4545                                                   | -0.010 | 0.024 | 0.66 | 423/2941                                                                            | 0.99 | (0.84-1.17) | 0.92 | Al Olama et al. (2013)   |
| rs3774315  | 3q26    | 172231986 | G/A                                          | 0.28             | 1                 | 4545                                                   | 0.024  | 0.023 | 0.29 | 423/2941                                                                            | 1.13 | (0.96-1.32) | 0.15 | FitzGerald et al. (2011) |

<sup>a</sup>Effect allele is the allele associated with the change in beta or odds ratio. The results are orientated so that the effect allele corresponds to the risk allele from the published study.

<sup>b</sup>EAF=Effect allele frequency among controls

<sup>c</sup>Info=Information score from IMPUTE2

**Supplementary Table 7.** Case-control association results for prostate cancer risk stratified by disease aggressiveness for the three SNPs associated with Gleason score

| SNP                             | Cytoband | Position    | Risk allele <sup>a</sup> /<br>Other allele | Stage           | Gleason ≤ 6               |                         |                              | Gleason ≥ 8               |                         |                             | P <sub>heterogeneity</sub>   |
|---------------------------------|----------|-------------|--------------------------------------------|-----------------|---------------------------|-------------------------|------------------------------|---------------------------|-------------------------|-----------------------------|------------------------------|
|                                 |          |             |                                            |                 | No. of cases/<br>controls | OR (95% CI)             | P                            | No. of cases/<br>controls | OR (95% CI)             | P                           |                              |
| <b>Novel loci</b>               |          |             |                                            |                 |                           |                         |                              |                           |                         |                             |                              |
| rs35148638                      | 5q14.3   | 86,610,989  | C/A                                        | Stage 1         | 2693/2941                 | 0.96 (0.88-1.04)        | 0.31                         | 423/2941                  | 1.32 (1.12-1.57)        | 1.04x10 <sup>-3</sup>       | 9.23x10 <sup>-4</sup>        |
|                                 |          |             |                                            | Stage 2         | 2728/6391                 | 0.97 (0.90-1.05)        | 0.47                         | 747/6391                  | 1.24 (1.10-1.40)        | 5.18x10 <sup>-4</sup>       | 7.70x10 <sup>-4</sup>        |
|                                 |          |             |                                            | Stage 3         | 1382/1728                 | 1.08 (0.96-1.21)        | 0.21                         | 468/1728                  | 0.99 (0.84-1.15)        | 0.87                        | 0.38                         |
|                                 |          |             |                                            | <b>Combined</b> | <b>6803/11060</b>         | <b>0.99 (0.94-1.04)</b> | <b>0.57</b>                  | <b>1638/11060</b>         | <b>1.18 (1.09-1.28)</b> | <b>8.85x10<sup>-5</sup></b> | <b>2.89x10<sup>-4</sup></b>  |
| rs78943174                      | 3q26.31  | 175,252,736 | C/T                                        | Stage 1         | 2693/2941                 | 0.81 (0.61-1.08)        | 0.14                         | 423/2941                  | 2.00 (1.10-3.70)        | 0.02                        | 0.008                        |
|                                 |          |             |                                            | Stage 2         | 2723/6378                 | 0.98 (0.75-1.28)        | 0.88                         | 745/6378                  | 1.32 (0.81-2.13)        | 0.28                        | 0.30                         |
|                                 |          |             |                                            | Stage 3         | 1382/1728                 | 0.58 (0.42-0.81)        | 0.002                        | 468/1728                  | 0.97 (0.56-1.67)        | 0.91                        | 0.12                         |
|                                 |          |             |                                            | <b>Combined</b> | <b>6798/11047</b>         | <b>0.81 (0.68-0.95)</b> | <b>0.01</b>                  | <b>1636/11047</b>         | <b>1.33 (0.97-1.82)</b> | <b>0.07</b>                 | <b>0.006</b>                 |
| <b>Previously reported loci</b> |          |             |                                            |                 |                           |                         |                              |                           |                         |                             |                              |
| rs62113212                      | 19q13.33 | 51,360,840  | T/C                                        | Stage 1         | 2692/2941                 | 0.70 (0.60-0.81)        | 3.05x10 <sup>-6</sup>        | 423/2941                  | 1.31 (1.00-1.72)        | 0.05                        | 7.39x10 <sup>-5</sup>        |
|                                 |          |             |                                            | Stage 2         | 2728/6389                 | 0.70 (0.61-0.80)        | 4.16x10 <sup>-7</sup>        | 747/6389                  | 1.16 (0.95-1.41)        | 0.14                        | 3.57x10 <sup>-5</sup>        |
|                                 |          |             |                                            | Stage 3         | 1382/1728                 | 0.83 (0.74-0.93)        | 0.002                        | 468/1728                  | 1.11 (0.95-1.30)        | 0.18                        | 0.003                        |
|                                 |          |             |                                            | <b>Combined</b> | <b>6802/11058</b>         | <b>0.75 (0.70-0.81)</b> | <b>3.51x10<sup>-13</sup></b> | <b>1638/11058</b>         | <b>1.16 (1.04-1.30)</b> | <b>0.01</b>                 | <b>1.44x10<sup>-10</sup></b> |

<sup>a</sup>Risk allele is the allele associated with an increased risk of aggressive prostate cancer (Gleason ≥ 8)

**Supplementary Table 8.** Association results for prostate cancer risk stratified by disease aggressiveness from the African American Prostate Cancer (AAPC) Consortium for the three SNPs associated with Gleason score

| SNP        | Chr      | Position  | Info  | Risk allele/<br>other allele | RAF   | Gleason ≤ 6                |                  |      | Gleason ≥ 8                |                  |      |
|------------|----------|-----------|-------|------------------------------|-------|----------------------------|------------------|------|----------------------------|------------------|------|
|            |          |           |       |                              |       | No. cases/<br>No. controls | OR (95% CI)      | P    | No. cases/<br>No. controls | OR (95% CI)      | P    |
| rs35148638 | 5q14.3   | 86610989  | 1     | C/A                          | 0.092 | 2311/4678                  | 1.11 (0.98-1.26) | 0.10 | 1091/4678                  | 0.97 (0.82-1.15) | 0.72 |
| rs78943174 | 3q26.31  | 175252736 | 0.394 | C/T                          | 0.999 | 2311/4678                  | 0.75 (0.31-5.68) | 0.69 | 1091/4678                  | 1.11 (0.11-7.33) | 0.92 |
| rs62113212 | 19q13.33 | 51360840  | 0.997 | T/C                          | 0.015 | 2311/4678                  | 0.71 (0.51-0.99) | 0.04 | 1091/4678                  | 1.10 (0.74-1.63) | 0.63 |

**Supplementary Table 9.** HaploReg results for SNPs reaching genome-wide significance ( $P < 5 \times 10^{-8}$ ) for Gleason score among cases

| DNase enrichment analysis |                              |           |        |     |     |      |       |
|---------------------------|------------------------------|-----------|--------|-----|-----|------|-------|
| Cell type                 |                              | DNase     |        |     |     |      |       |
| ID                        | Description                  | Treatment | Center | Obs | Exp | Fold | p     |
| GM12891                   | B-lymphocyte, lymphoblastoid | None      | Duke   | 1   | 0   | 38.9 | 0.025 |
| HSMM_emb                  | embryonic myoblast           | None      | Duke   | 1   | 0   | 44.4 | 0.022 |
| GM12878                   | B-lymphocyte, lymphoblastoid | None      | AWG    | 1   | 0   | 31.9 | 0.031 |

Query SNP: [rs35148638](#) and variants with  $r^2 \geq 0.8$

| SNP                        | chr: pos (hg19) | LD ( $r^2$ ) | LD ( $D'$ ) | Ref | Alt | EUR Freq | SiPhy cons | Promoter histone marks | Enhancer histone marks | DNase         | Proteins bound | eQTL tissue     | Motifs changed   | GENCO DE genes | dbSNP funct annot |
|----------------------------|-----------------|--------------|-------------|-----|-----|----------|------------|------------------------|------------------------|---------------|----------------|-----------------|------------------|----------------|-------------------|
| <a href="#">rs7719891</a>  | chr 5: 86577352 | 0.8          | 0.93        | A   | G   | 0.28     |            |                        |                        |               |                |                 | 7 altered motifs | RASA1          | intronic          |
| <a href="#">rs1428438</a>  | chr 5: 86598808 | 0.86         | 1           | T   | A   | 0.23     |            |                        | NHLF, HMEC             | 7 cell types  |                | EWSR1-FLI1,PPAR | RASA1            | intronic       |                   |
| <a href="#">rs35148638</a> | chr 5: 86610989 | 1            | 1           | A   | C   | 0.26     |            |                        |                        |               |                | Foxm1,SIX5,YY1  | RASA1            | intronic       |                   |
| <a href="#">rs4421140</a>  | chr 5: 86656964 | 0.82         | 0.97        | T   | C   | 0.24     |            |                        | NHLF, HSMM, NHEK       | 28 cell types |                |                 | RASA1            | intronic       |                   |

Query SNP: [rs78943174](#) and variants with  $r^2 \geq 0.8$

|                            |                  |   |   |   |   |      |  |  |  |  |  |  |      |          |          |
|----------------------------|------------------|---|---|---|---|------|--|--|--|--|--|--|------|----------|----------|
| <a href="#">rs78943174</a> | chr 3: 175252736 | 1 | 1 | C | T | 0.01 |  |  |  |  |  |  | NF-Y | NAALADL2 | intronic |
|----------------------------|------------------|---|---|---|---|------|--|--|--|--|--|--|------|----------|----------|

Query SNP: [rs62113212](#) and variants with  $r^2 \geq 0.8$

|                             |                  |      |      |   |   |      |  |  |    |                                  |  |                  |                     |          |
|-----------------------------|------------------|------|------|---|---|------|--|--|----|----------------------------------|--|------------------|---------------------|----------|
| <a href="#">rs62113212</a>  | chr 19: 51360840 | 1    | 1    | C | T | 0.08 |  |  |    | GM12878,G<br>M12891,HS<br>MM_emb |  | Sin3Ak-20,Znf143 | KLK3                | intronic |
| <a href="#">rs17632542</a>  | chr 19: 51361757 | 1    | 1    | T | C | 0.08 |  |  | H1 | GM12892                          |  | NF-AT,STAT       | KLK3                | missense |
| <a href="#">rs62113214</a>  | chr 19: 51362537 | 1    | 1    | T | G | 0.08 |  |  | H1 | HMEC                             |  | 7 altered motifs | KLK3                | intronic |
| <a href="#">rs76765083</a>  | chr 19: 51362715 | 1    | 1    | T | G | 0.08 |  |  | H1 |                                  |  | 4 altered motifs | KLK3                | intronic |
| <a href="#">rs111362352</a> | chr 19: 51365440 | 0.96 | 0.98 | C | T | 0.08 |  |  |    | BE2_C                            |  | HIF1,HIF1::Arnt  | 1.4kb 3'<br>of KLK3 |          |
